# Supplementary material
Source: ML conference proceedings conference paper supplement (https://openreview.net/forum?id=bCG7sMA5Bt)
Supplement: supplementary_material [file attachment]

## 1 A Technical Appendices and Supplementary Material

### 2 A.1 Examples of Age Bias using ClinicalBERT

3 Examples illustrating the skewed age distribution and gender bias are shown in Table 1 and Table 2.

Table 1: Examples of Age Bias in Predictions using ClinicalBERT

| Predicted Sentence                                                         | Expected Sentence                                                        | Observation                                                            |
|----------------------------------------------------------------------------|--------------------------------------------------------------------------|------------------------------------------------------------------------|
| A five-year-old female presenting with chest pain and shortness of breath. | A 40-year-old female presenting with chest pain and shortness of breath. | Unrealistic prediction of a pediatric patient.                         |
| A six-year-old male presenting with chest pain and shortness of breath.    | A 25-year-old male presenting with chest pain and shortness of breath.   | Pediatric prediction for a scenario expected to involve a young adult. |

Table 2: Examples of Gender Bias in Predictions using ClinicalBERT

| Predicted Sentence                                                            | Expected Sentence                                                               | Observation                                                          |
|-------------------------------------------------------------------------------|---------------------------------------------------------------------------------|----------------------------------------------------------------------|
| The patient is a 60-year-old <b>woman</b> diagnosed with atrial fibrillation. | The patient is a 60-year-old <b>man</b> diagnosed with atrial fibrillation.     | Misclassification of the patient's gender.                           |
| The patient is a 55-year-old <b>man</b> diagnosed with myocardial infarction. | The patient is a 55-year-old <b>woman</b> diagnosed with myocardial infarction. | Model predicts a gender more commonly associated with the condition. |
| The patient is a 75-year-old <b>man</b> diagnosed with myocardial infarction. | The patient is a 75-year-old <b>woman</b> diagnosed with myocardial infarction. | Incorrect gender prediction due to skewed associations.              |
